# Supplementary material
Source: publisher figshare collection journal article supplement (https://karger.figshare.com/ndownloader/files/8713348)
Supplement: Supplementary file 1 [file 8713348]

## Supplementary Data (Online only)

**Supplementary Table 1.** Univariate analysis of clinical predictors for dysphagia with high risk of aspiration (DHA) (FEES-proven)

| Variable                                | DHA<br>(n=30) | No Dysphagia<br>(n=26) | p-value |
|-----------------------------------------|---------------|------------------------|---------|
| Age, mean $\pm$ SD                      | 70 $\pm$ 14   | 69 $\pm$ 12            | n.s.    |
| NIHSS, mean $\pm$ SD                    | 13 $\pm$ 5    | 8 $\pm$ 4              | <0.001  |
| <b>Established Criteria</b>             |               |                        |         |
| Dysarthria <sup>1</sup>                 | 8 (27%)       | 10 (39%)               | n.s.    |
| Dysphonia <sup>1</sup>                  | 4 (13%)       | 7 (27%)                | n.s.    |
| Abnormal gag reflex                     | 10 (33%)      | 2 (8%)                 | <0.05   |
| Abnormal volitional cough               | 19 (63%)      | 8 (31%)                | <0.05   |
| Cough after swallow                     | 21 (70%)      | 5 (19%)                | <0.01   |
| Voice change after swallow <sup>1</sup> | 1 (3%)        | 1 (4%)                 | n.s.    |
| <b>New Criteria</b>                     |               |                        |         |
| Aphasia                                 | 30 (100%)     | 18 (69%)               | <0.001  |
| 3 (no aphasia)                          | 0             | 8 (31%)                |         |
| 2 (mild/rest aphasia)                   | 2 (6%)        | 4 (15%)                |         |
| 1 (moderate aphasia)                    | 1 (3%)        | 2 (8%)                 |         |
| 0 (severe aphasia)                      | 27 (90%)      | 12 (46%)               |         |
| Buccofacial Apraxia                     | 26 (87%)      | 7 (27%)                | <0.001  |

Patients with mild dysphagia without risk of aspiration (n=11) were not included in this analysis.

<sup>1</sup> Due to impaired speech production caused by acute stroke-related aphasia, the items dysarthria, dysphonia, voice change after swallow could only be assessed in 31, 31, and 33 patients, respectively.

**Supplementary Table 2.** Sensitivity, Specificity, PPV and NPV for clinical items predicting DHA (FEES-proven)

| Item                              | Sensitivity<br>(%) | Specificity<br>(%) | PPV<br>(%) | NPV<br>(%) |
|-----------------------------------|--------------------|--------------------|------------|------------|
| Dysarthria (n=31)                 | 72                 | 50                 | 44         | 77         |
| Dysphonia (n=31)                  | 36                 | 65                 | 36         | 65         |
| Abnormal gag reflex (n=56)        | 33                 | 92                 | 83         | 55         |
| Abnormal volitional cough (n=56)  | 63                 | 69                 | 70         | 62         |
| Cough after swallow (n=56)        | 70                 | 81                 | 81         | 70         |
| Voice change after swallow (n=33) | 9                  | 95                 | 50         | 68         |
| Aphasia (n=56)                    | 100                | 31                 | 63         | 100        |
| Buccofacial Apraxia (n=56)        | 87                 | 73                 | 79         | 83         |
